# Supplementary material for: Discriminatory ability of gas chromatography-ion mobility spectrometry to identify patients hospitalised with COVID-19 and predict prognosis
Source: bioRxiv or medRxiv preprint supplement (doi:10.1101/2022.02.28.22271571), 2022-02-28

# Discriminatory ability of gas chromatography-ion mobility spectrometry to identify patients hospitalised with COVID-19 and predict prognosis

## Supplementary Material

### Supplementary figure 1

Receiver Operator Characteristic curves for the two different classifiers used to distinguish between COVID-19 vs Healthy Control, COVID-19 vs Respiratory control, COVID-19 inpatients that subsequently required CPAP vs COVID-19 inpatients with no subsequent requirement for CPAP

COVID-19 vs Healthy Control

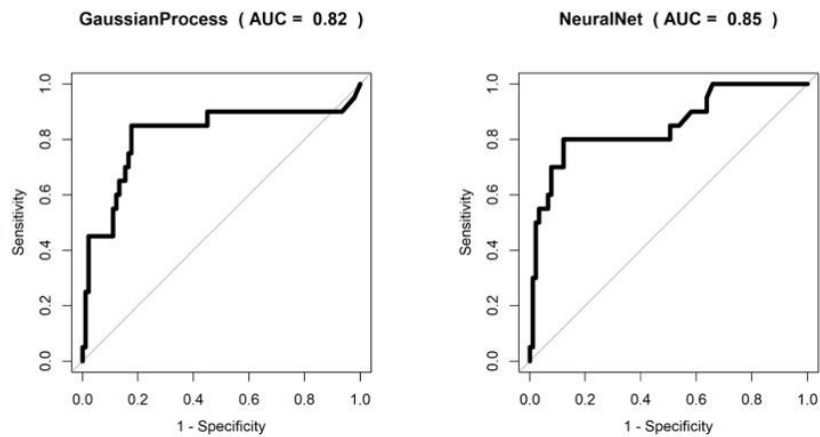

COVID-19 vs Respiratory control

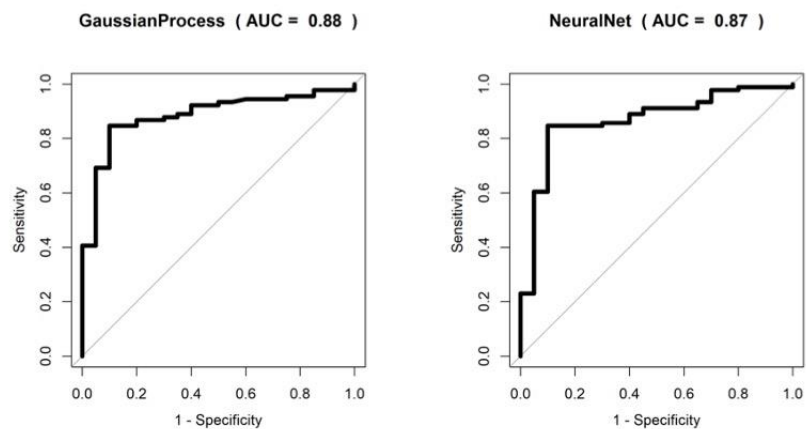

COVID-19 inpatients that subsequently required CPAP vs COVID-19 inpatients with no subsequent requirement for CPAP

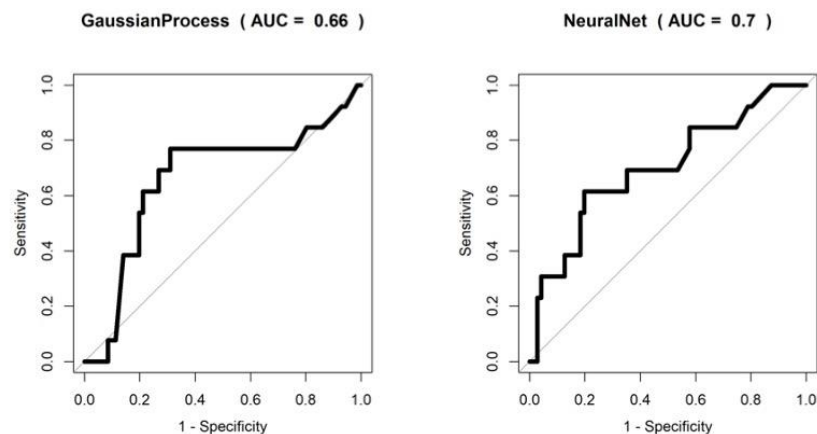

### Supplementary picture 1

Collection of breath sample into 10ml syringe

*Image removed as it contains a photograph of a person. Please contact the corresponding author to request a copy of this picture.*

### Supplementary picture 2

GC-IMS Breath analysis instrument (G.A.S. BreathSpec™)

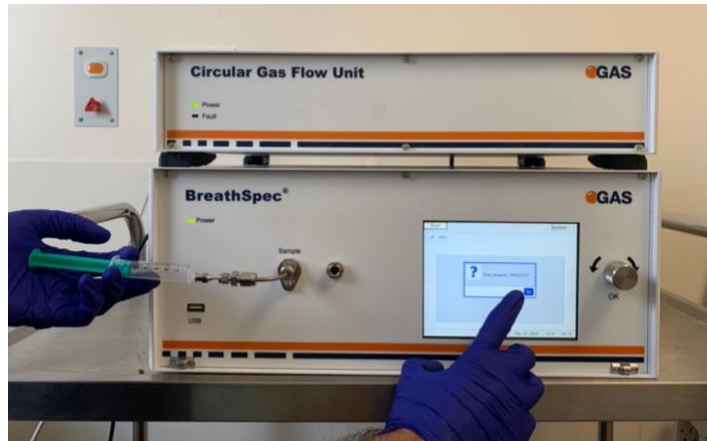

Supplement: Supplementary file [file media-1.pdf]
